# Supplementary material for: Improvement in Protein Domain Identification Is Reached by Breaking Consensus, with the Agreement of Many Profiles and Domain Co-occurrence
Source: PubMed Central journal article supplement (PMC4966962; doi:10.1371/journal.pcbi.1005038), 2016-07-29
Supplement: pcbi.1005038.s001.pdf [file pcbi.1005038.s001.pdf]

| <b>Bacteria</b>                   | <b>Archaea</b>        | <b>Viruses</b>                | <b>Eukaryota</b> |
|-----------------------------------|-----------------------|-------------------------------|------------------|
| Actinobacteria                    | Aenigmarchaeota       | Deltavirus                    | Metazoa          |
| Aquificae                         | Crenarchaeota         | dsDNA viruses, no RNA stage   | Fungi            |
| Armatimonadetes                   | environmental samples | dsRNA viruses                 | Viridiplantae    |
| Bacteroidetes/Chlorobi group      | Euryarchaeota         | environmental samples         | Alveolata        |
| Caldiserica                       | Geoarchaeota          | Retro-transcribing viruses    | Stramenopiles    |
| Chlamydiae/Verrucomicrobia group  | Korarchaeota          | Satellites                    | Amoebozoa        |
| Chloroflexi                       | Nanohaloarchaeota     | ssDNA viruses                 | Euglenozoa       |
| Chrysiogenetes                    | Parvarchaeota         | ssRNA viruses                 | Choanoflagellida |
| Cyanobacteria                     | Thaumarchaeota        | unassigned viruses            | Fornicata        |
| Deferribacteres                   | unclassified Archaea  | unclassified archaeal viruses | Heterolobosea    |
| Deinococcus-Thermus               | Diapherotrites        | unclassified phages           | Rhodophyta       |
| Dictyoglomi                       | Nanoarchaeota         | unclassified virophages       | Parabasalia      |
| Elusimicrobia                     |                       | unclassified viruses          | Opisthokonta     |
| environmental samples             |                       |                               | Cryptophyta      |
| Firmicutes                        |                       |                               | Aquificaceae     |
| Fusobacteria                      |                       |                               | Rhizaria         |
| Gemmatimonadetes                  |                       |                               | Haptophyceae     |
| Nitrospinae                       |                       |                               | Metagenomes      |
| Nitrospirae                       |                       |                               |                  |
| Planctomycetes                    |                       |                               |                  |
| Proteobacteria                    |                       |                               |                  |
| Spirochaetes                      |                       |                               |                  |
| Synergistetes                     |                       |                               |                  |
| Tenericutes                       |                       |                               |                  |
| Thermodesulfobacteria             |                       |                               |                  |
| Thermotogae                       |                       |                               |                  |
| Fibrobacteres/Acidobacteria group |                       |                               |                  |
| unclassified Bacteria             |                       |                               |                  |
