# Supplementary material for: Improvement in Protein Domain Identification Is Reached by Breaking Consensus, with the Agreement of Many Profiles and Domain Co-occurrence
Source: PubMed Central journal article supplement (PMC4966962; doi:10.1371/journal.pcbi.1005038), 2016-07-29
Supplement: pcbi.1005038.s002.pdf [file pcbi.1005038.s002.pdf]

|         | 1-mer    |         |         |         |         |         |
|---------|----------|---------|---------|---------|---------|---------|
|         | Original |         | New     |         | All     |         |
|         | mean     | var     | mean    | var     | mean    | var     |
| CLADE   | 0.0003   | 2.03e-8 | 0.00698 | 7.43e-7 | 0.00728 | 6.59e-7 |
| HMMScan | 0        | 0       | 0.0002  | 3.57e-9 | 0.0002  | 3.57e-9 |
|         | 4-mer    |         |         |         |         |         |
|         | Original |         | New     |         | All     |         |
|         | mean     | var     | mean    | var     | mean    | var     |
| CLADE   | 0.023    | 1.3e-6  | 0.0076  | 4.47e-7 | 0.010   | 9.32e-7 |
| HMMScan | 0.007    | 4.4e-7  | 0.0002  | 1.07e-8 | 0.007   | 4.89e-7 |
