# Supplementary material for: Improvement in Protein Domain Identification Is Reached by Breaking Consensus, with the Agreement of Many Profiles and Domain Co-occurrence
Source: PubMed Central journal article supplement (PMC4966962; doi:10.1371/journal.pcbi.1005038), 2016-07-29
Supplement: pcbi.1005038.s003.pdf [file pcbi.1005038.s003.pdf]

| <b>E-values range</b>    | <b>MDP</b>  | <b>MDP DC</b> |
|--------------------------|-------------|---------------|
| $\leq 1e-60$             | 60          | 28            |
| $1e-60 < E_v \leq 1e-30$ | 237         | 101           |
| $1e-30 < E_v \leq 1e-15$ | 455         | 218           |
| $1e-15 < E_v \leq 1e-05$ | 627         | 376           |
| $1e-05 < E_v \leq 1e-03$ | 309         | 177           |
| <b>Total</b>             | <b>1688</b> | <b>900</b>    |
