# Supplementary material for: Improvement in Protein Domain Identification Is Reached by Breaking Consensus, with the Agreement of Many Profiles and Domain Co-occurrence
Source: PubMed Central journal article supplement (PMC4966962; doi:10.1371/journal.pcbi.1005038), 2016-07-29
Supplement: pcbi.1005038.s004.pdf [file pcbi.1005038.s004.pdf]

|                                          | <b>CLADE</b> | <b>CLADE<sub>BEV</sub></b> |
|------------------------------------------|--------------|----------------------------|
| <b>Improvement</b>                       | 29.88        | 10.27                      |
| <b>Agreement on domain predictions</b>   | 97.54        | 93.91                      |
| <b>Agreement on domain architectures</b> | 96.94        | 87.24                      |
