# Supplementary material for: Improvement in Protein Domain Identification Is Reached by Breaking Consensus, with the Agreement of Many Profiles and Domain Co-occurrence
Source: PubMed Central journal article supplement (PMC4966962; doi:10.1371/journal.pcbi.1005038), 2016-07-29
Supplement: pcbi.1005038.s005.pdf [file pcbi.1005038.s005.pdf]

**CLADE and HHblits at FDR 0.1%**

|                                                      | <b>CLADE</b>                                               |              | <b>HHblits</b> |              |
|------------------------------------------------------|------------------------------------------------------------|--------------|----------------|--------------|
|                                                      | <b>Cooc</b>                                                | <b>Total</b> | <b>Cooc</b>    | <b>Total</b> |
|                                                      | Domains occurring on proteins predicted for the first time | 467          | 916            | 96           |
| Domains enriching known protein architectures        | 1052                                                       | 1200         | 327            | 371          |
| Brand-new domains in <i>P. falciparum</i> annotation | 603                                                        | 971          | 114            | 195          |

**HHblits predictions**

|                                                      | <b>FDR 1%</b>                                              |              | <b>FDR 5%</b> |              | <b>FDR 10%</b> |              |
|------------------------------------------------------|------------------------------------------------------------|--------------|---------------|--------------|----------------|--------------|
|                                                      | <b>Cooc</b>                                                | <b>Total</b> | <b>Cooc</b>   | <b>Total</b> | <b>Cooc</b>    | <b>Total</b> |
|                                                      | Domains occurring on proteins predicted for the first time | 365          | 824           | 688          | 2305           | 772          |
| Domains enriching known protein architectures        | 867                                                        | 1013         | 1275          | 2032         | 1371           | 2570         |
| Brand-new domains in <i>P. falciparum</i> annotation | 451                                                        | 787          | 902           | 2646         | 1025           | 3869         |

**HHblits vs CLADE predictions**

|                                                      | <b>FDR 0.1%</b>                                            |               | <b>FDR 1%</b> |               | <b>FDR 5%</b> |               | <b>FDR 10%</b> |               |
|------------------------------------------------------|------------------------------------------------------------|---------------|---------------|---------------|---------------|---------------|----------------|---------------|
|                                                      | <b>Total</b>                                               | <b>Shared</b> | <b>Total</b>  | <b>Shared</b> | <b>Total</b>  | <b>Shared</b> | <b>Total</b>   | <b>Shared</b> |
|                                                      | Domains occurring on proteins predicted for the first time | 269           | 205           | 824           | 385           | 2305          | 466            | 3260          |
| Domains enriching known protein architectures        | 371                                                        | 236           | 1013          | 461           | 2032          | 524           | 2570           | 529           |
| Brand-new domains in <i>P. falciparum</i> annotation | 195                                                        | 121           | 787           | 247           | 2646          | 309           | 3869           | 322           |
