# Supplementary material for: Improvement in Protein Domain Identification Is Reached by Breaking Consensus, with the Agreement of Many Profiles and Domain Co-occurrence
Source: PubMed Central journal article supplement (PMC4966962; doi:10.1371/journal.pcbi.1005038), 2016-07-29

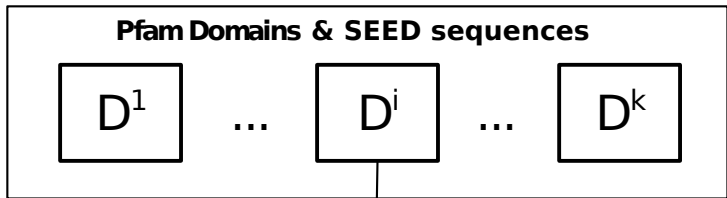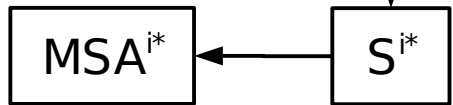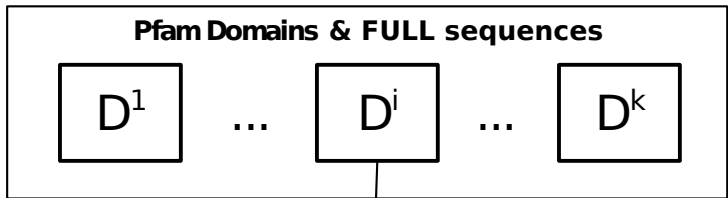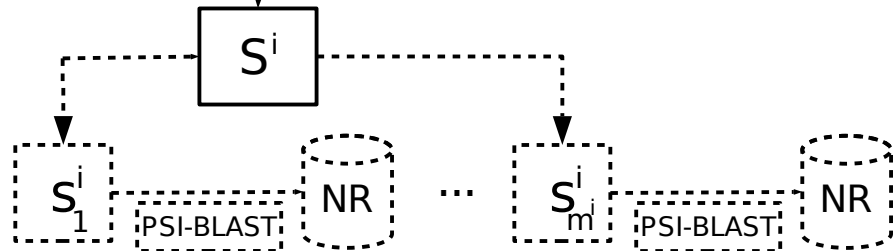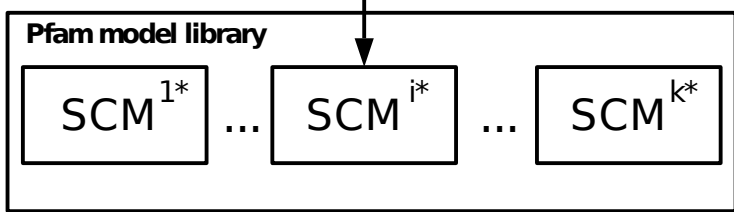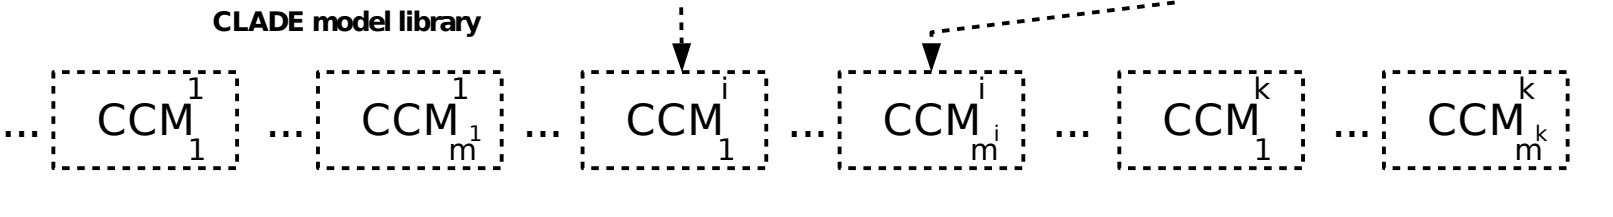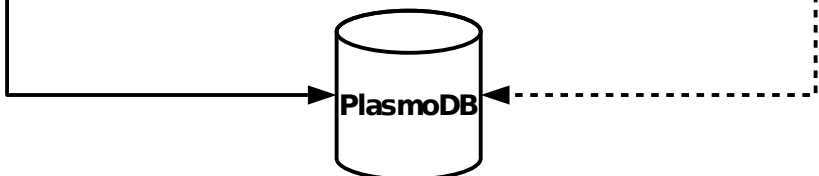

Supplement: pcbi.1005038.s006.pdf [file pcbi.1005038.s006.pdf]
