# Supplementary material for: Improvement in Protein Domain Identification Is Reached by Breaking Consensus, with the Agreement of Many Profiles and Domain Co-occurrence
Source: PubMed Central journal article supplement (PMC4966962; doi:10.1371/journal.pcbi.1005038), 2016-07-29
Supplement: pcbi.1005038.s009.pdf [file pcbi.1005038.s009.pdf]

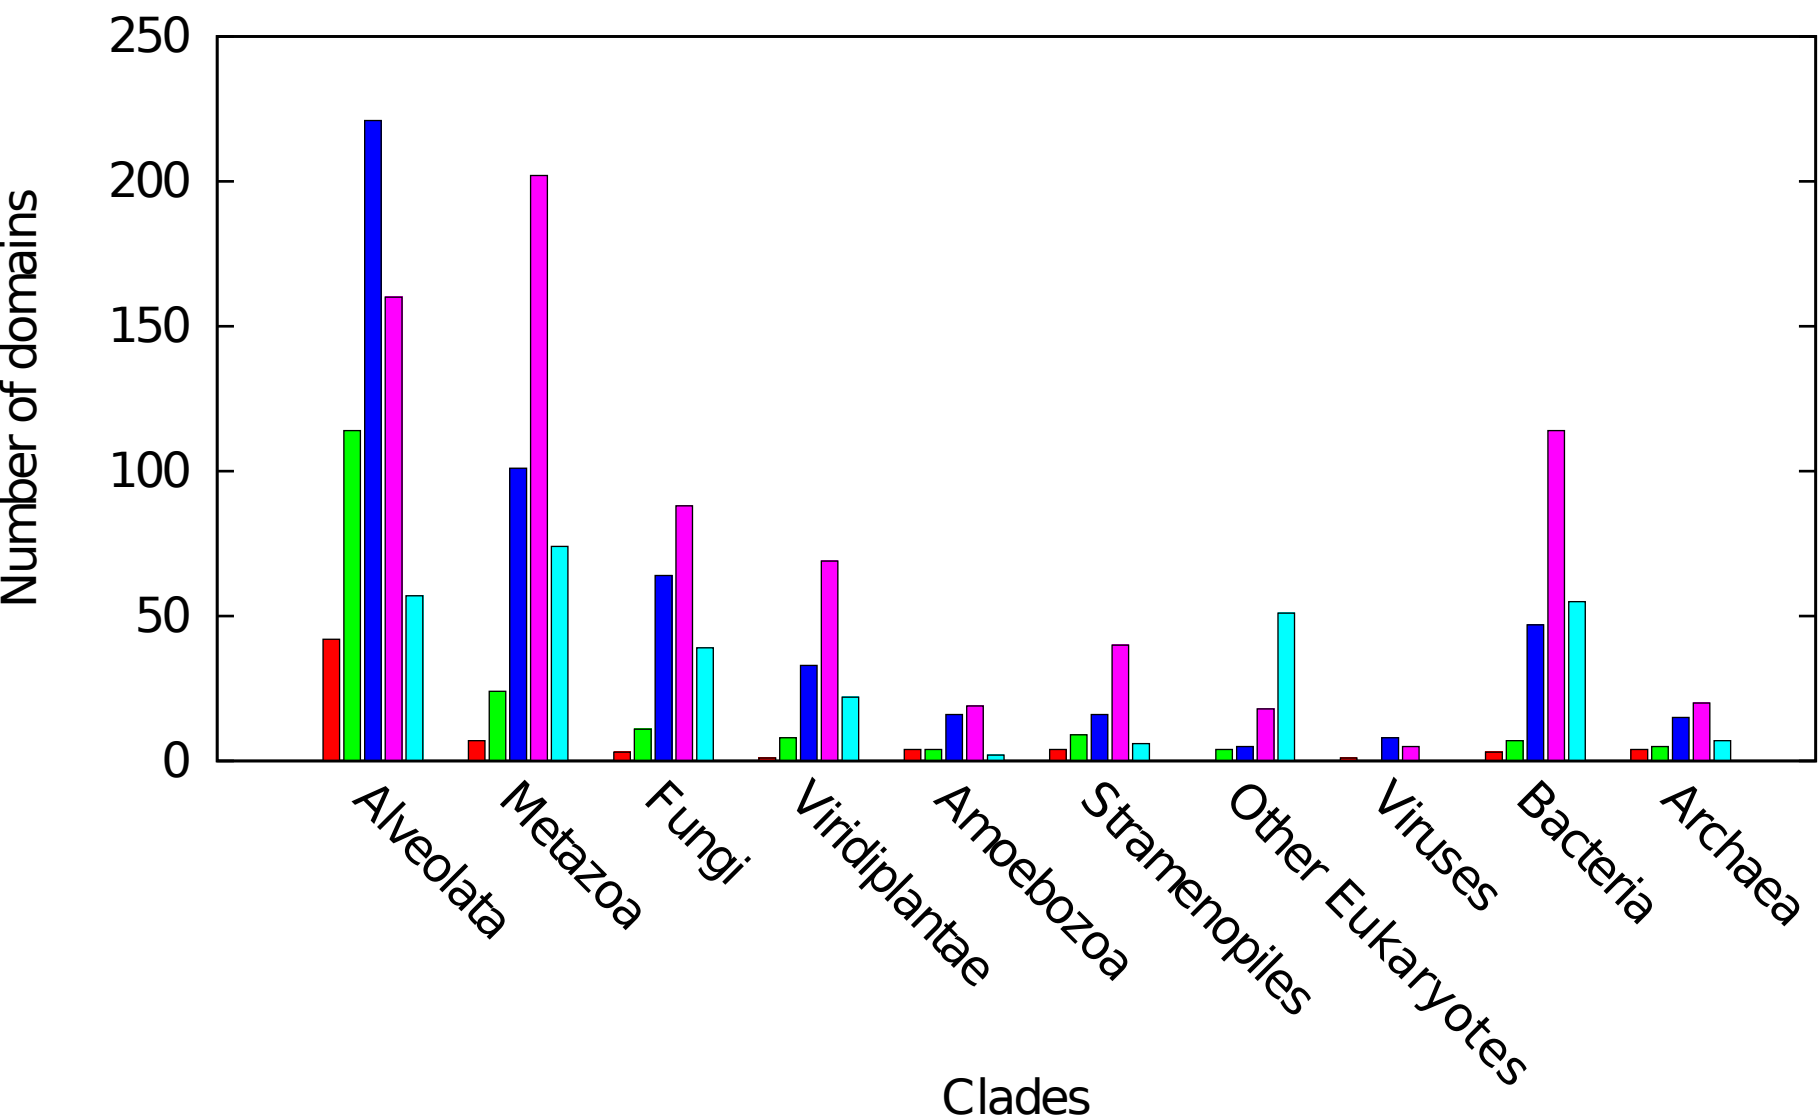

$ev < 1e-60$  █  
 $1e-60 \leq ev \leq 1e-30$  █  
 $1e-30 \leq ev \leq 1e-15$  █

$1e-15 \leq ev \leq 1e-5$  █  
 $1e-5 \leq ev \leq 1e-3$  █
